# Supplementary material for: Prevalence and Demographic, Socioeconomic, and Behavioral Risk Factors of Self-Reported Symptoms of Sexually Transmitted Infections (STIs) among Ever-Married Women: Evidence from Nationally Representative Surveys in Bangladesh
Source: MDPI journal article supplement (doi:10.3390/ijerph19031906), 2022-02-08
Supplement: s1 [file s1]

**Supplementary Table S1.** Logistic regression on the association of abnormal genital discharge and genital sores with demographic, socio-economic and behavioural risk factors (multiple imputation analysis).

| Study factors                                  | Model 3<br>(abnormal<br>genital<br>discharge) | 95% CI        | p-value | Model 3<br>(genital<br>sores) | 95% CI        | p-value |
|------------------------------------------------|-----------------------------------------------|---------------|---------|-------------------------------|---------------|---------|
| <b>Demographic factors</b>                     |                                               |               |         |                               |               |         |
| Age (Ref:15-24 years)                          |                                               |               |         |                               |               |         |
| 25-34 years                                    | 1.14**                                        | (1.04 - 1.26) | 0.008   | 1.19**                        | (1.06 - 1.35) | 0.004   |
| 35-49 years                                    | 0.92                                          | (0.83 - 1.02) | 0.114   | 1.02                          | (0.89 - 1.17) | 0.813   |
| Age at first marriage (Ref: 18 years or above) |                                               |               |         |                               |               |         |
| 9-14 years                                     | 1.10                                          | (0.98 - 1.24) | 0.106   | 1.04                          | (0.91 - 1.18) | 0.569   |
| 15-17 years                                    | 1.18*                                         | (1.05 - 1.32) | 0.004   | 1.05                          | (0.92 - 1.20) | 0.470   |
| Type of residence (Ref: Rural)                 |                                               |               |         |                               |               |         |
| Urban                                          | 1.01                                          | (0.91 - 1.13) | 0.827   | 1.07                          | (0.94 - 1.22) | 0.277   |
| <b>Socio-economic factors</b>                  |                                               |               |         |                               |               |         |
| Education (Ref: No education)                  |                                               |               |         |                               |               |         |
| Primary                                        | 1.08                                          | (0.95 - 1.22) | 0.220   | 1.13                          | (0.99 - 1.29) | 0.078   |
| Secondary                                      | 0.95                                          | (0.83 - 1.09) | 0.479   | 1.09                          | (0.93 - 1.28) | 0.293   |
| Higher                                         | 0.78*                                         | (0.62 - 0.98) | 0.032   | 1.06                          | (0.81 - 1.40) | 0.655   |
| Partner's education (Ref: No education)        |                                               |               |         |                               |               |         |
| Primary                                        | 1.06                                          | (0.96 - 1.18) | 0.242   | 1.05                          | (0.92 - 1.19) | 0.481   |
| Secondary                                      | 0.97                                          | (0.87 - 1.09) | 0.638   | 0.99                          | (0.86 - 1.14) | 0.880   |
| Higher                                         | 0.87                                          | (0.73 - 1.03) | 0.100   | 0.90                          | (0.73 - 1.12) | 0.344   |
| Wealth quintile (Ref: Poorest)                 |                                               |               |         |                               |               |         |
| Poorer                                         | 1.02                                          | (0.91 - 1.15) | 0.728   | 1.01                          | (0.87 - 1.17) | 0.938   |
| Middle                                         | 0.95                                          | (0.83 - 1.08) | 0.436   | 0.89                          | (0.76 - 1.05) | 0.168   |
| Richer                                         | 0.88                                          | (0.77 - 1.01) | 0.079   | 0.86                          | (0.72 - 1.03) | 0.109   |
| Richest                                        | 0.73***                                       | (0.61 - 0.86) | <0.001  | 0.76**                        | (0.61 - 0.93) | 0.008   |
| Paid work status (Ref: No)                     |                                               |               |         |                               |               |         |
| Yes                                            | 1.13*                                         | (1.02 - 1.26) | 0.019   | 1.20**                        | (1.06 - 1.35) | 0.003   |
| <b>Behavioral factors</b>                      |                                               |               |         |                               |               |         |
| Contraceptive method (Ref: No method)          |                                               |               |         |                               |               |         |
| Traditional method                             | 1.40***                                       | (1.22 - 1.61) | <0.001  | 1.12                          | (0.94 - 1.33) | 0.214   |
| Modern method                                  | 1.08                                          | (1.00 - 1.18) | 0.063   | 1.08                          | (0.98 - 1.20) | 0.111   |
| Knowledge about STI (Ref: No)                  |                                               |               |         |                               |               |         |
| Yes                                            | 1.10                                          | (0.99 - 1.23) | 0.081   | 1.27***                       | (1.13 - 1.43) | <0.001  |
| Wife beating justified (Ref: No)               |                                               |               |         |                               |               |         |
| Yes                                            | 1.01                                          | (0.89 - 1.16) | 0.834   | 1.29*                         | (1.11 - 1.51) | 0.001   |
| Women's healthcare decision-making (Ref: Wife) |                                               |               |         |                               |               |         |
| Wife and husband                               | 0.77                                          | (0.69 - 0.87) | <0.001  | 0.81*                         | (0.70 - 0.93) | 0.002   |
| Respondent and someone else                    | 0.87                                          | (0.73 - 1.04) | 0.137   | 0.78*                         | (0.62 - 0.97) | 0.025   |
| Husband                                        | 0.93                                          | (0.81 - 1.05) | 0.246   | 0.87                          | (0.76 - 1.01) | 0.062   |

Exposure to mass media (Ref: Not at all)

|                         |                       |        |                       |        |
|-------------------------|-----------------------|--------|-----------------------|--------|
| Irregular               | 1.22* (1.07 - 1.38)   | 0.002  | 1.01 (0.85 - 1.18)    | 0.950  |
| Regular                 | 1.11* (1.00 - 1.22)   | 0.047  | 1.02 (0.90 - 1.16)    | 0.737  |
| Survey year (Ref: 2007) |                       |        |                       |        |
| Survey Year = 2011      | 1.48*** (1.31 - 1.68) | <0.001 | 1.39*** (1.20 - 1.60) | <0.001 |
| Survey Year = 2014      | 1.54*** (1.35 - 1.75) | <0.001 | 1.04 (0.90 - 1.21)    | 0.572  |
| Constant                | 0.07*** (0.06 - 0.09) | <0.001 | 0.04*** (0.03 - 0.06) | <0.001 |

---

|             |        |        |
|-------------|--------|--------|
| Observation | 43,557 | 43,557 |
|-------------|--------|--------|

---

Note: \*\*\* p<0.001, \*\* p<0.01, \* p<0.05
